# Supplementary material
Source: PubMed Central journal article supplement (PMC3031367)
Supplement: supp_124_4_532__5.pdf [file supp_124_4_532__5.pdf]

**Table S1.** A table summarizing the statistics of the mitotic index and phenotypes of 1022M, 1022M+Stil and 3T3 cells expressing shRNA targeting Stil, as shown in Figs 1 and 2.

| <b>Remarks</b>                 | <b>Monopolar</b> | <b>Multipolar</b> | <b>Normal</b> | <b>Number of mitoses</b> | <b>Number of cells</b> |                         |
|--------------------------------|------------------|-------------------|---------------|--------------------------|------------------------|-------------------------|
| *                              | –                | 10                | –             | 10                       | 7200                   | <b>1022M</b>            |
| *                              | –                | 2                 | 12            | 14                       | 1100                   | <b>1022M+ Stil</b>      |
| **                             | 2                | –                 | 31            | 33                       | 800                    | <b>3T3 RNAi control</b> |
| **<br>9 out of 17 have 3 poles | 3                | 17                | 1             | 21                       | 3000                   | <b>3T3 RNAi Stil</b>    |

Student's *t*-tests: \*,  $P < 1.59281\text{E-}06$ , \*\*,  $P < 4.83089\text{E-}07$  for 1022M and 3T3, respectively.
