# Supplementary material
Source: PubMed Central journal article supplement (PMC3031367)

### Chfr mRNA levels

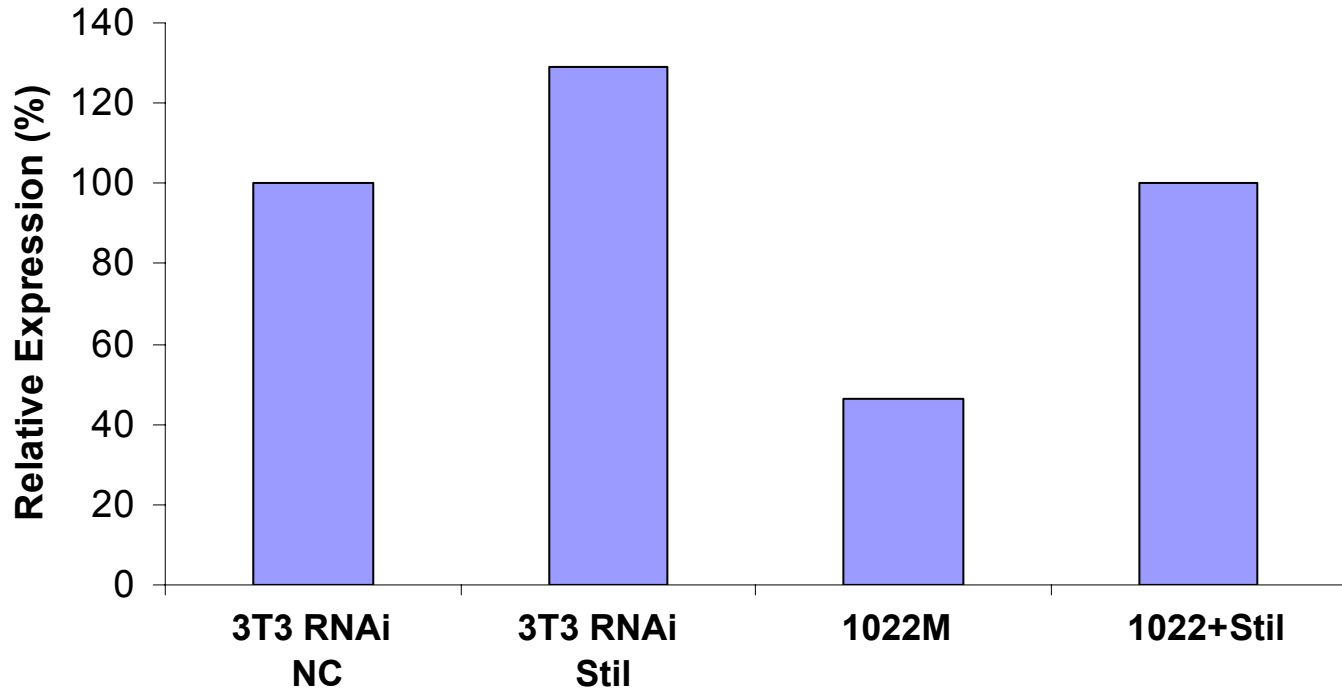

Supplement: supp_124_4_532__1.pdf [file supp_124_4_532__1.pdf]

### Chfr mRNA levels in 3T3 CHX experiment

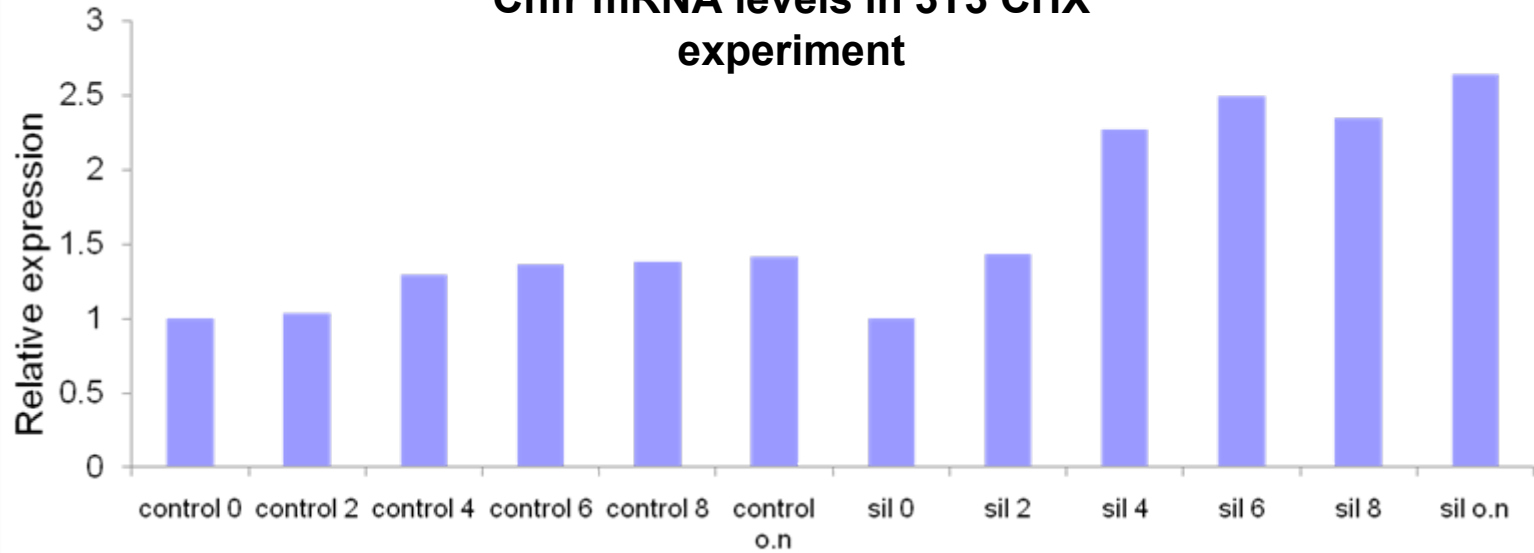

Supplement: supp_124_4_532__2.pdf [file supp_124_4_532__2.pdf]

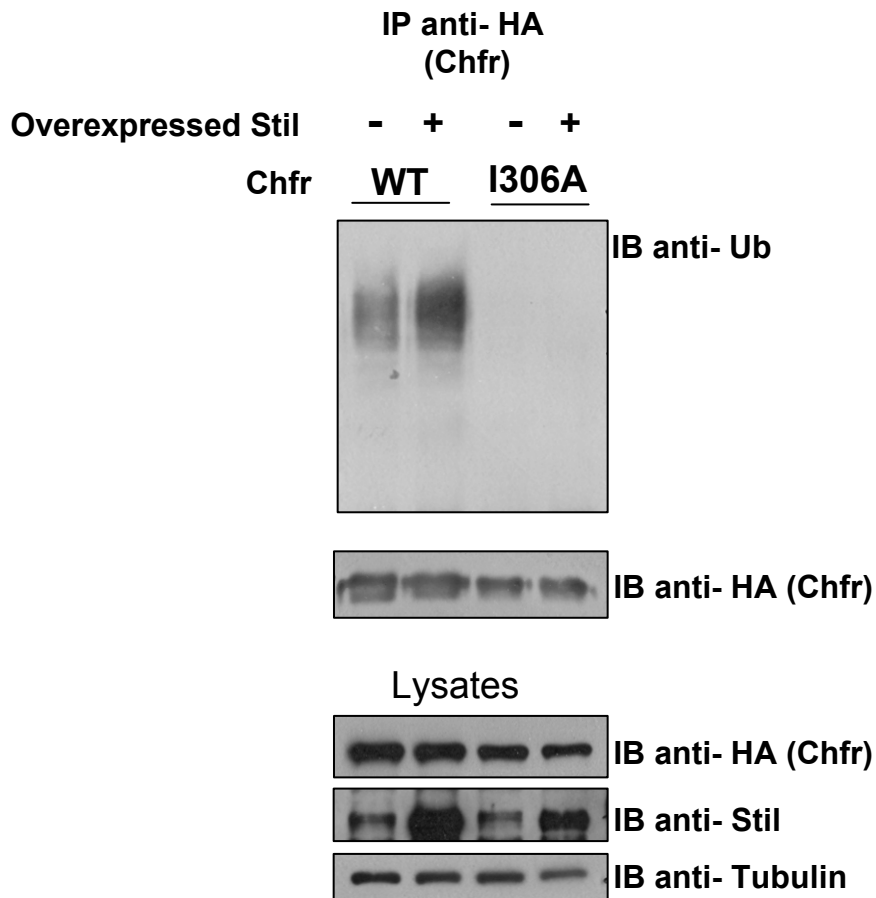

Supplement: supp_124_4_532__3.pdf [file supp_124_4_532__3.pdf]

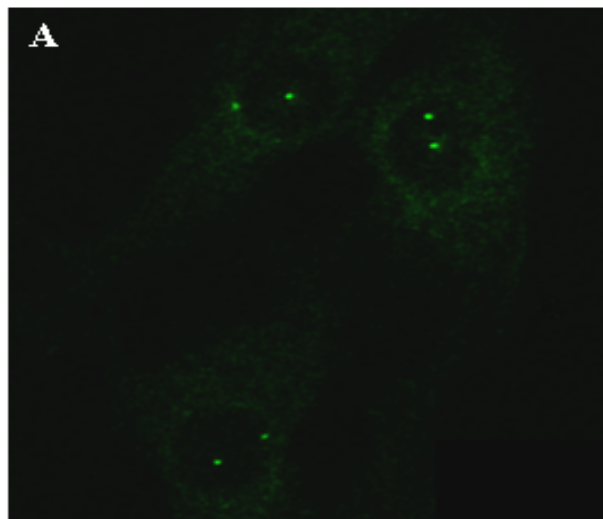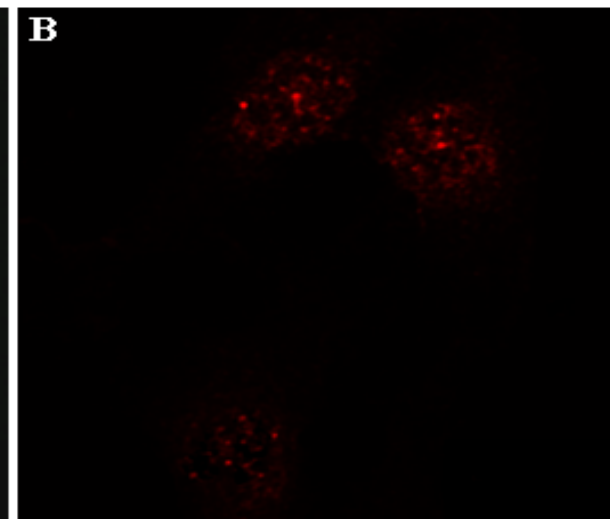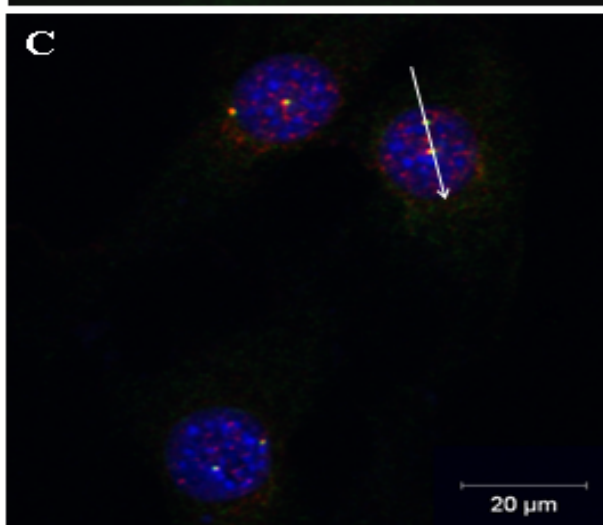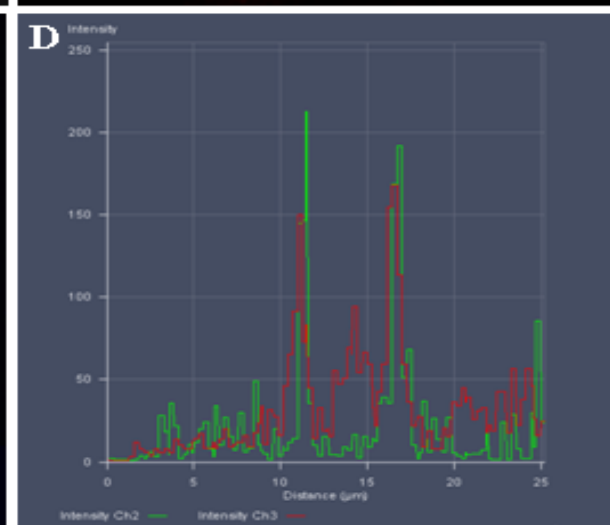

Supplement: supp_124_4_532__4.pdf [file supp_124_4_532__4.pdf]
